# Supplementary material for: Tetraenone A: A New β-Ionone Derivative from Tetraena aegyptia
Source: MDPI journal article supplement (doi:10.3390/metabo13121202), 2023-12-18
Supplement: s1 [file s1]

## SUPPLEMENTARY MATERIAL

**Tetraenone A: A new  $\beta$ -ionone Derivative from *Tetraena aegyptia***

Ahmed Ashour <sup>1,2\*</sup>, Asmaa E. Sherif <sup>1,2</sup>, Selwan M. El-Sayed<sup>3</sup>, Ji-Young Kim <sup>4</sup>, Dae Sik Jang <sup>4</sup>, Abtin Anvari <sup>5</sup>, Abdelbasset A. Farahat <sup>5,6</sup>, Sabrin R. M. Ibrahim <sup>7,8</sup>, Gamal A. Mohamed <sup>9</sup>, Bayan E. Ainousah <sup>10</sup>, Raghad F. Aljohani <sup>11</sup>, Razan R. Al-Hejaili <sup>11</sup>, Rahaf Khoja <sup>11</sup>, Ahmed H.E. Hassan <sup>3,\*</sup> and Ahmed A. Zaki <sup>2,12</sup>

<sup>1</sup> Department of Pharmacognosy, Faculty of Pharmacy, Prince Sattam Bin Abdulaziz University, Al-kharj 11942, Saudi Arabia; ahmedadelashour@yahoo.com (A.A.); asmaasherif80@yahoo.com (A.E.S.)

<sup>2</sup> Department of Pharmacognosy, Faculty of Pharmacy, Mansoura University, Mansoura 35516, Egypt

<sup>3</sup> Department of Medicinal Chemistry, Faculty of Pharmacy, Mansoura University, Mansoura 35516, Egypt; selwanmahmoud@hotmail.com (S.M.E.); ahmed\_hassan@mans.edu.eg (A.H.E.H.)

<sup>4</sup> Department of Life and Nanopharmaceutical Sciences, Kyung Hee University, Seoul 02447, Republic of Korea; jk293@khu.ac.kr (J.Y.K.); dsjang@khu.ac.kr (D.S.J.)

<sup>5</sup> Master of Pharmaceutical Sciences Program, California Northstate University, 9700 W Taron Dr., Elk Grove, CA 95757, U.S.A.; abtin.anvari8815@cnsu.edu (A.A.); abdelbasset.farahat@cnsu.edu (A.A.F.)

<sup>6</sup> Department of Pharmaceutical Organic Chemistry, Faculty of Pharmacy, Mansoura University, Mansoura 35516, Egypt

<sup>7</sup> Preparatory Year Program, Department of Chemistry, Batterjee Medical College, Jeddah 21442, Saudi Arabia; sabrin.ibrahim@bmc.edu.sa

<sup>8</sup> Department of Pharmacognosy, Faculty of Pharmacy, Assiut University, Assiut 71526, Egypt; sabreen.ibrahim@pharm.aun.edu.eg

<sup>9</sup> Department of Natural Products and Alternative Medicine, Faculty of Pharmacy, King Abdulaziz University, Jeddah 21589, Saudi Arabia; gahusseini@kau.edu.sa

<sup>10</sup> Department of Pharmaceutical Chemistry, Faculty of Pharmacy, Umm Al-Qura University, Makkah 21955, Saudi Arabia; baaunosah@uqu.edu.sa

<sup>11</sup> College of Pharmacy, Taibah University, Medina, 42353, Saudi Arabia; Phraghad0@gmail.com (R.F.A.); razan\_alhujili@outlook.sa (R.R.A.); Ph.rahafkhoja@gmail.com (R.K.)

<sup>12</sup> Department of Medicinal Chemistry, College of Pharmacy, University of Florida, Gainesville, Florida 32610, United States; ahmedawadzaki@yahoo.co.uk

\* Correspondence: ahmedadelashour@yahoo.com (A.A.); ahmed\_hassan@mans.edu.eg (A.H.E.H.); sabrin.ibrahim@bmc.edu.sa

## List of tables and figures

**Table S1.** NMR data of compounds **1** and **2**

**Figure S1.**  $^1\text{H}$ -NMR Spectrum of Compound **1** (500 MHz,  $\text{CD}_3\text{OD}$ )

**Figure S2.**  $^{13}\text{C}$ -NMR Spectrum of Compound **1** (125 MHz,  $\text{CD}_3\text{OD}$ )

**Figure S3.** DEPT Spectrum of Compound **1** in  $\text{CD}_3\text{OD}$

**Figure S4.** COSY Spectrum of Compound **1** (500 MHz,  $\text{CD}_3\text{OD}$ )

**Figure S5.** HMQC Spectrum of Compound **1** (500 MHz,  $\text{CD}_3\text{OD}$ )

**Figure S6.** HMBC Spectrum of Compound **1** (500 MHz,  $\text{CD}_3\text{OD}$ )

**Figure S7.** NOESY Spectrum of Compound **1** (500 MHz,  $\text{CD}_3\text{OD}$ )

**Figure S8.** HRESI-MS of Compound **1**

**Figure S9.**  $^1\text{H}$ -NMR Spectrum of Compound **2** (500 MHz,  $\text{CD}_3\text{OD}$ )

**Figure S10.**  $^{13}\text{C}$ -NMR Spectrum of Compound **2** (125 MHz,  $\text{CD}_3\text{OD}$ )

**Figure S11.** TOCSY Spectrum of Compound **2** (500 MHz,  $\text{CD}_3\text{OD}$ )

**Figure S12.** HMQC Spectrum of Compound **2** (500 MHz,  $\text{CD}_3\text{OD}$ )

**Figure S13.** HMBC Spectrum of Compound **2** (500 MHz,  $\text{CD}_3\text{OD}$ )

**Figure S14.** NOESY Spectrum of Compound **2** (500 MHz,  $\text{CD}_3\text{OD}$ )

**Figure S15.** HRESI-MS of Compound **2**

Table S1. NMR data of compounds **1** and **2**

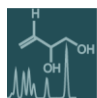

| 1   |            |                                                     | 2          |                                                            |
|-----|------------|-----------------------------------------------------|------------|------------------------------------------------------------|
| #   | $\delta_C$ | $\delta_H$                                          | $\delta_C$ | $\delta_H$                                                 |
| 1.  | 36.6       | -                                                   | 35.4       | -                                                          |
| 2.  | 75.7       | 4.53, <i>tt</i> (11.6, 4.4)                         | 43.3       | 1.48, <i>dd</i> (13.1, 9.9)<br>1.79, <i>d</i> (12.4)       |
| 3.  | 48.1       | 1.31, <i>t</i> (12.1)<br>2.31, <i>dd</i> (9.7, 5.2) | 72.4       | 4.51, <i>m</i>                                             |
| 4.  | 42.4       | 1.11, <i>m</i><br>2.02, <i>m</i>                    | 38.2       | 1.96, <i>dd</i> (14.8, 7.8)<br>2.50, <i>dd</i> (14.8, 5.2) |
| 5.  | 31.9       | 1.79, <i>m</i>                                      | 67.5       | -                                                          |
| 6.  | 58.7       | 1.61, <i>t</i> (10.6)                               | 70.4       | -                                                          |
| 7.  | 151.4      | 6.69, <i>dd</i> (15.9, 10.3)                        | 144.5      | 7.17, <i>d</i> (15.8)                                      |
| 8.  | 134.8      | 6.11, <i>d</i> (15.9)                               | 133.5      | 6.20, <i>d</i> (15.8)                                      |
| 9.  | 200.8      | -                                                   | 199.7      | -                                                          |
| 10. | 26.9       | 2.28, <i>s</i>                                      | 26.9       | 2.30, <i>s</i>                                             |
| 11. | 21.6       | 0.99, <i>s</i>                                      | 25.1       | 0.98, <i>s</i>                                             |
| 12. | 31.6       | 0.91, <i>s</i>                                      | 28.7       | 1.25, <i>s</i>                                             |
| 13. | 21.5       | 0.86, <i>d</i> (6.5)                                | 19.7       | 1.19, <i>s</i>                                             |

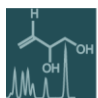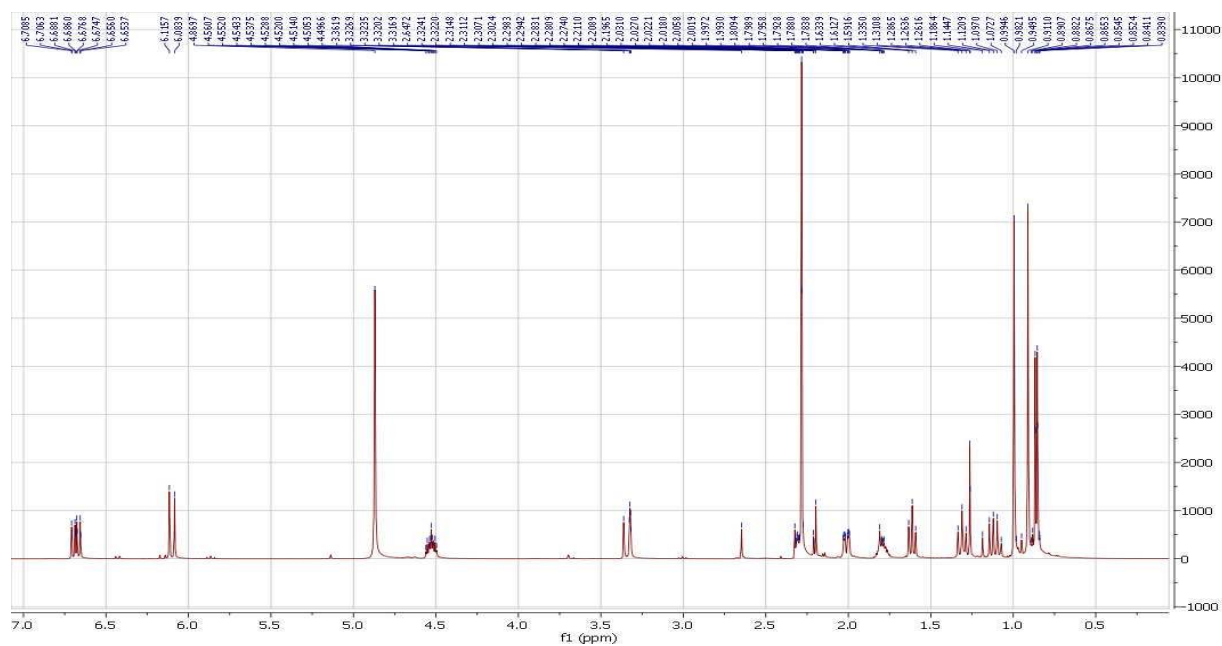

**Figure S1.**  $^1\text{H}$ -NMR Spectrum of Compound **1** (500 MHz,  $\text{CD}_3\text{OD}$ )

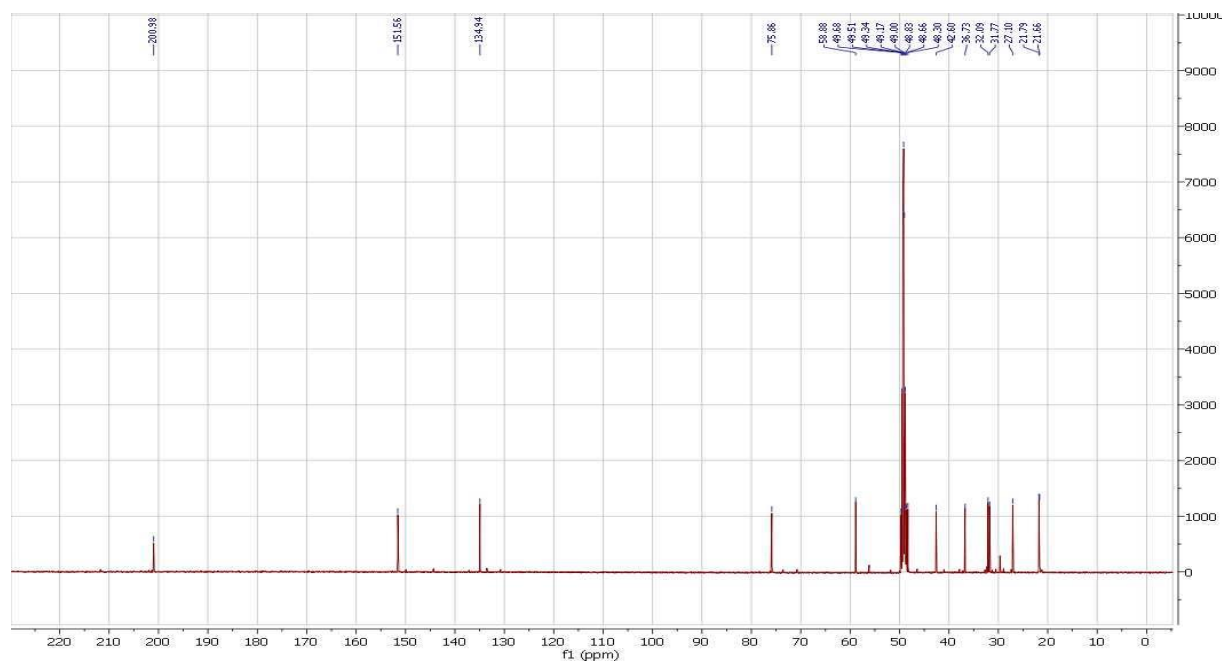

**Figure S2.**  $^{13}\text{C}$ -NMR Spectrum of Compound **1** (125 MHz,  $\text{CD}_3\text{OD}$ )

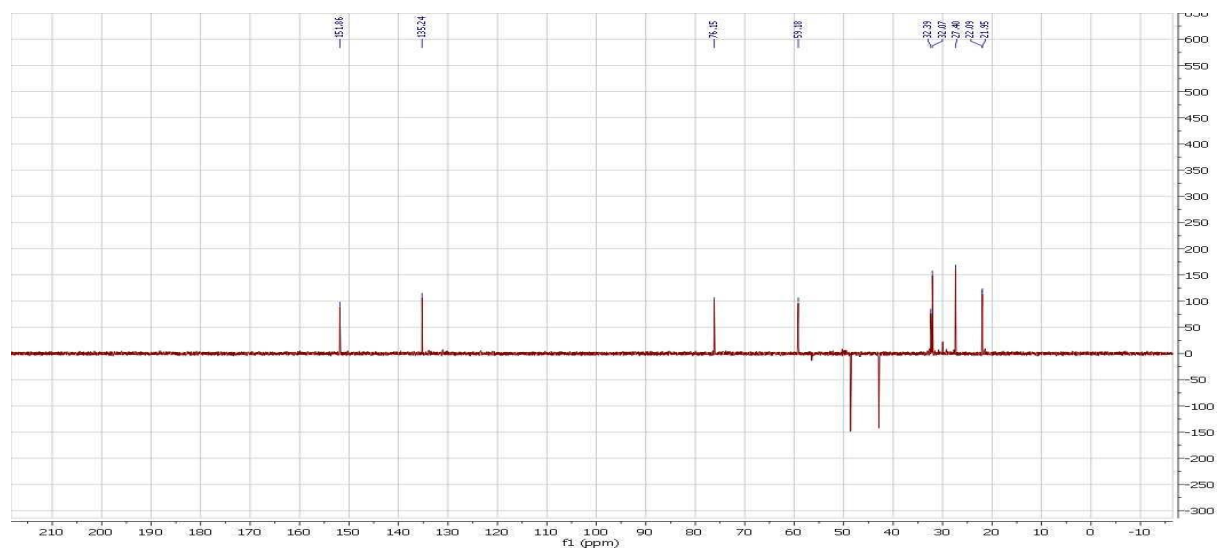

**Figure S3.** DEPT Spectrum of Compound **1** in CD<sub>3</sub>OD

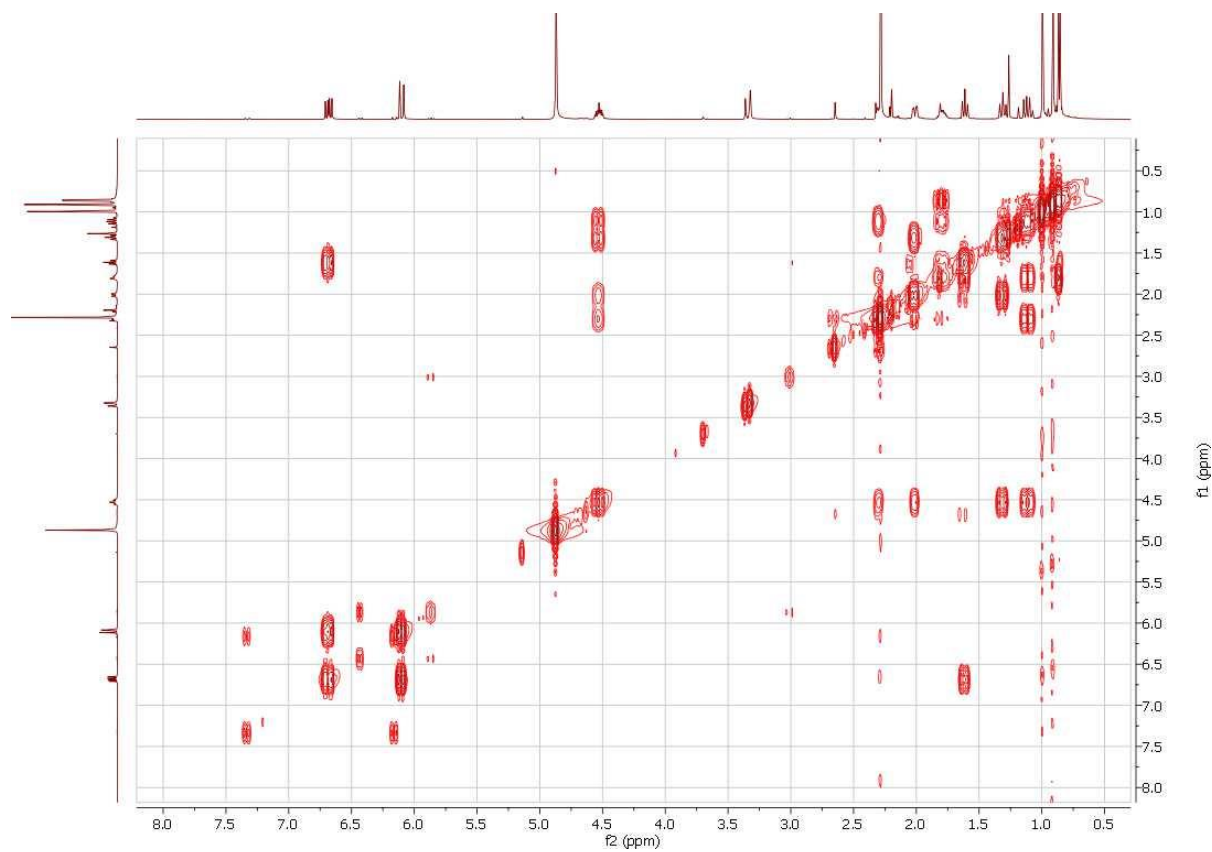

**Figure S4.** COSY Spectrum of Compound **1** (500 MHz, CD<sub>3</sub>OD)

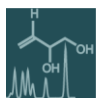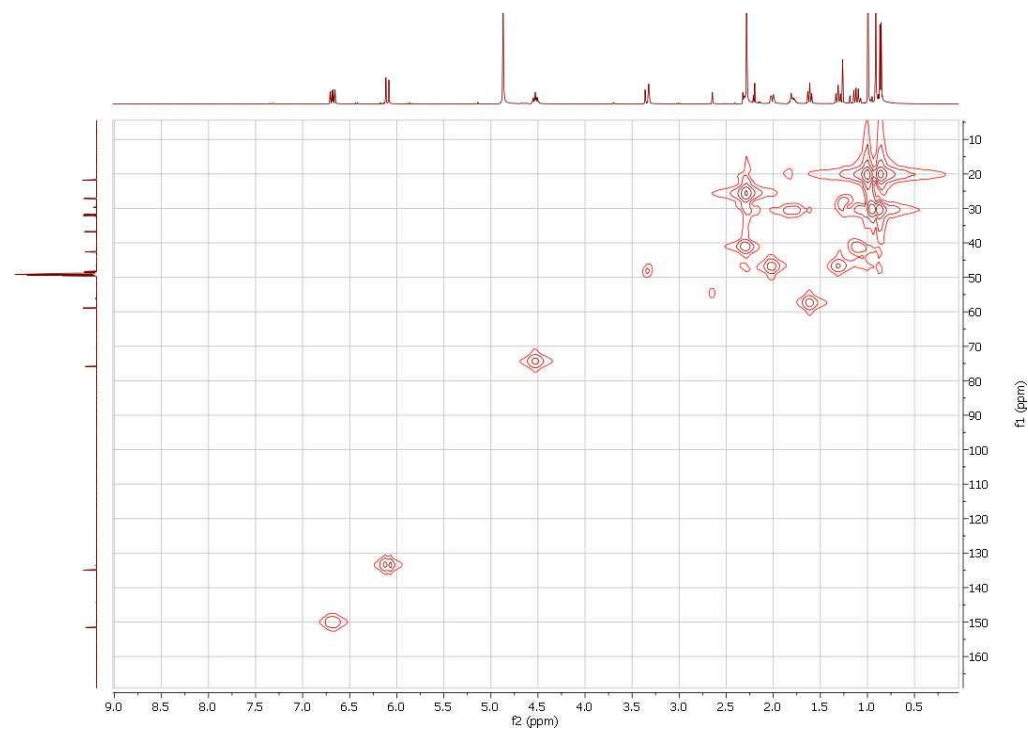

**Figure S5.** HMQC Spectrum of Compound **1** (500 MHz, CD<sub>3</sub>OD)

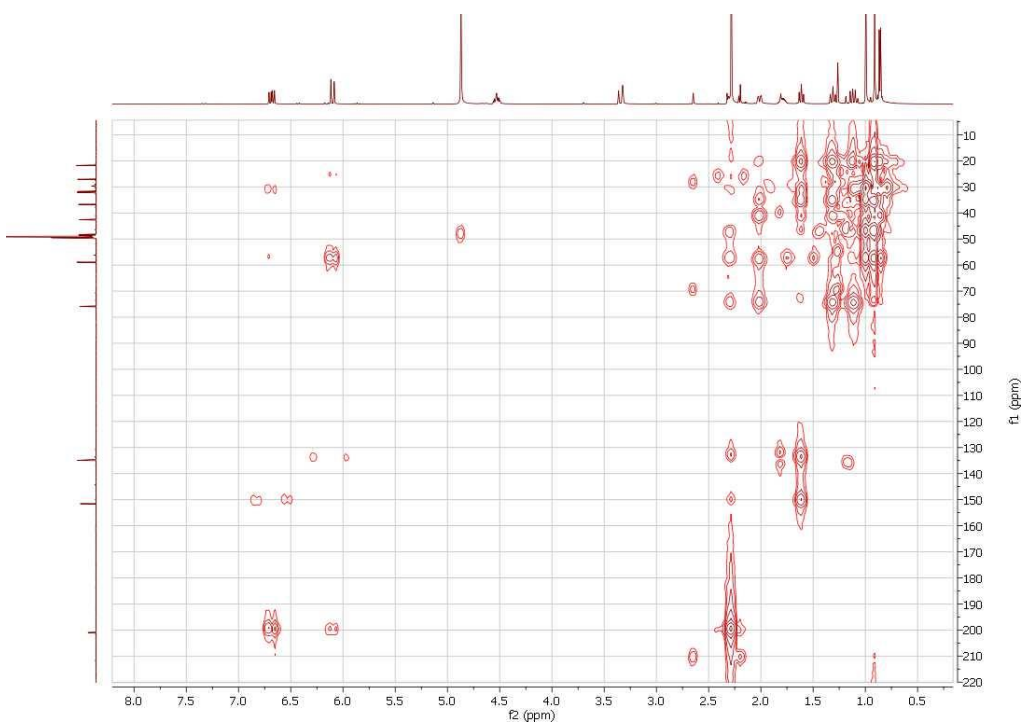

**Figure S6.** HMBC Spectrum of Compound **1** (500 MHz, CD<sub>3</sub>OD)

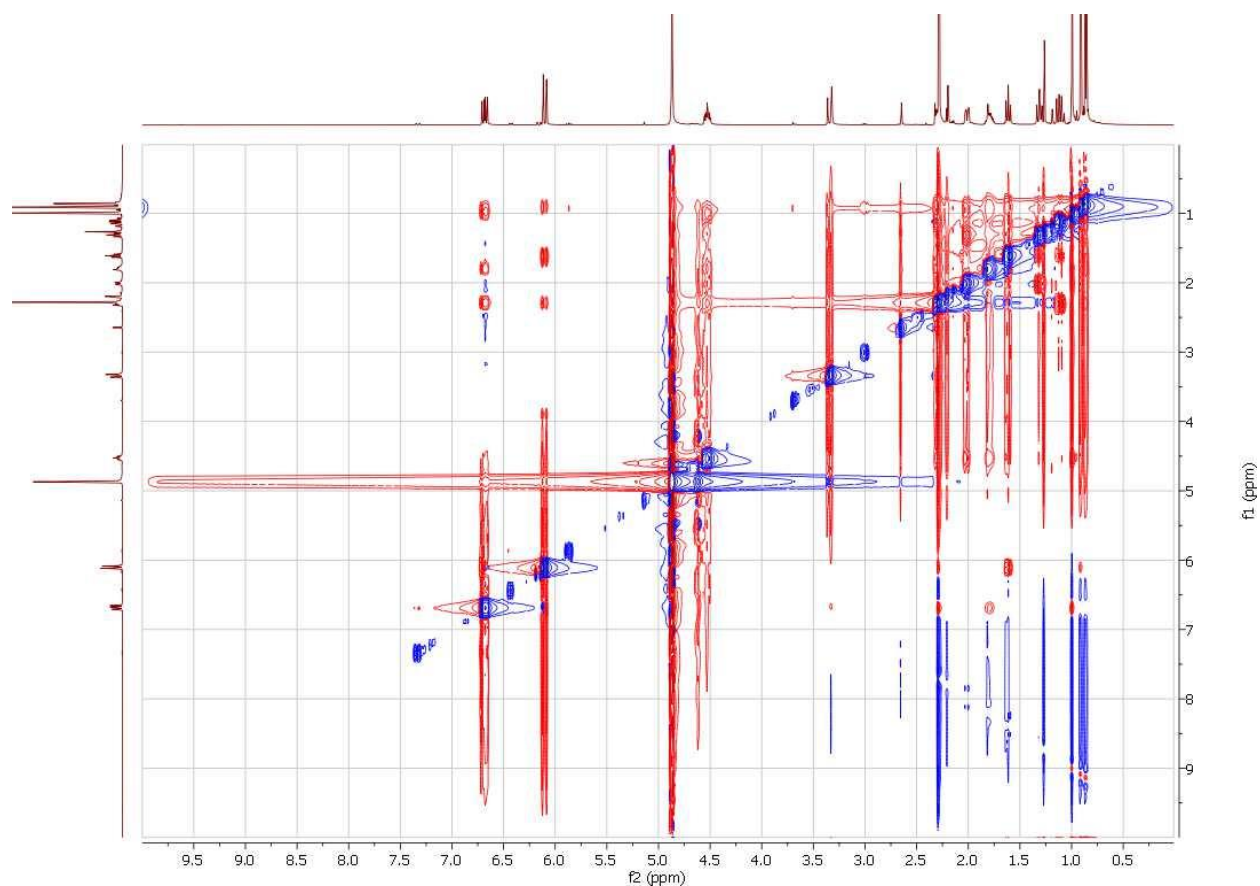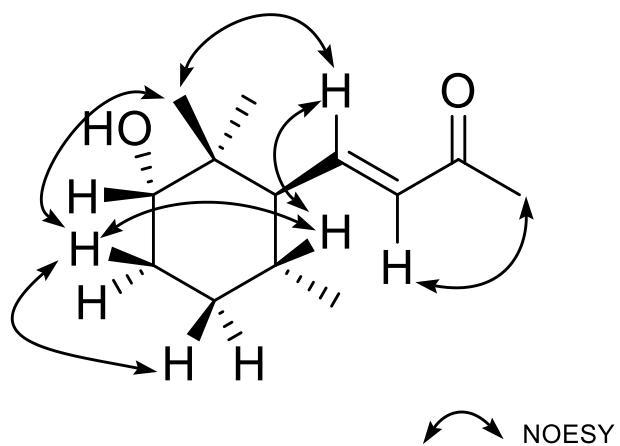

**Figure S7.** NOESY Spectrum of Compound **1** (500 MHz, CD<sub>3</sub>OD)

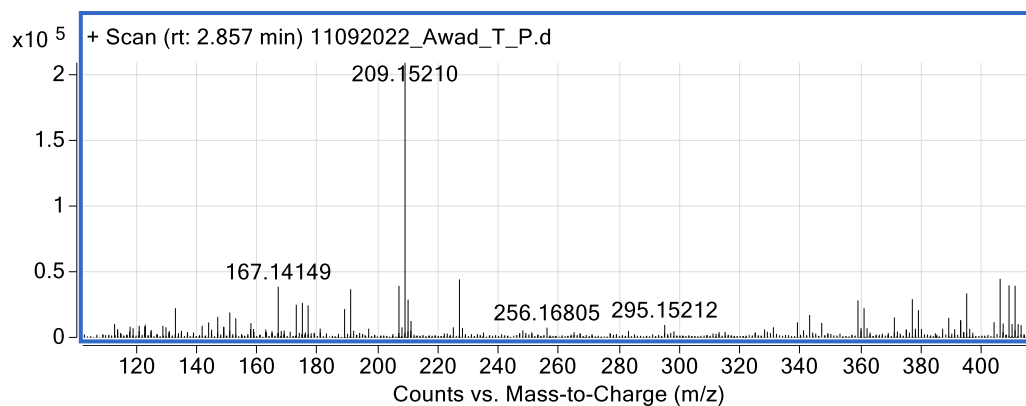

**Figure S8.** HRESI-MS of Compound 1

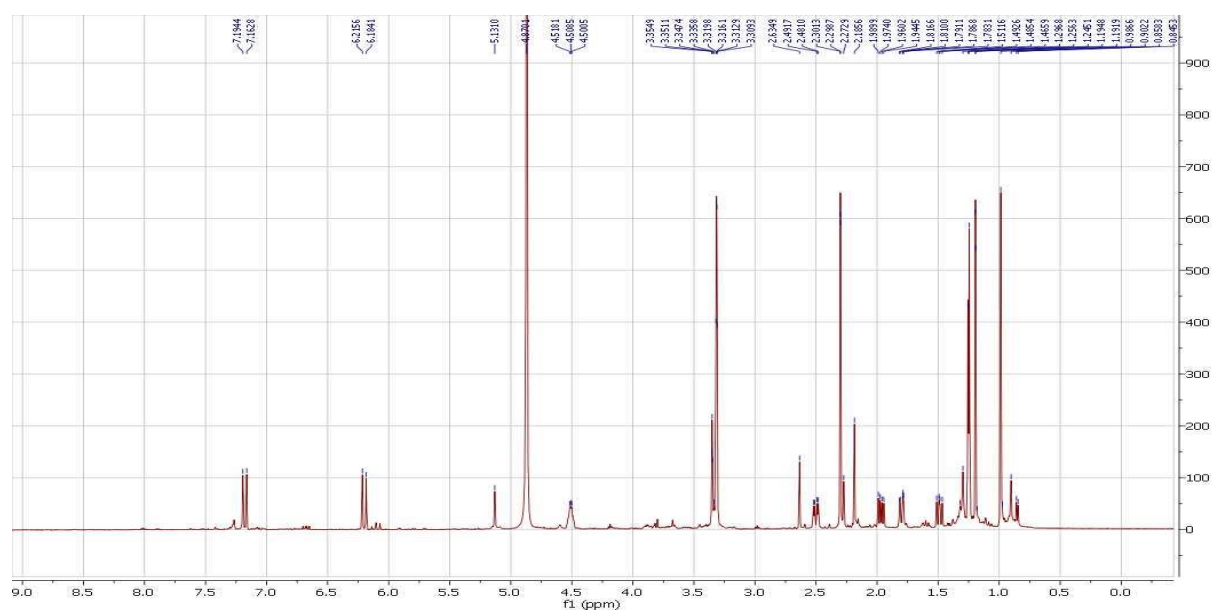

**Figure S9.** <sup>1</sup>H-NMR Spectrum of Compound 2 (500 MHz, CD<sub>3</sub>OD)



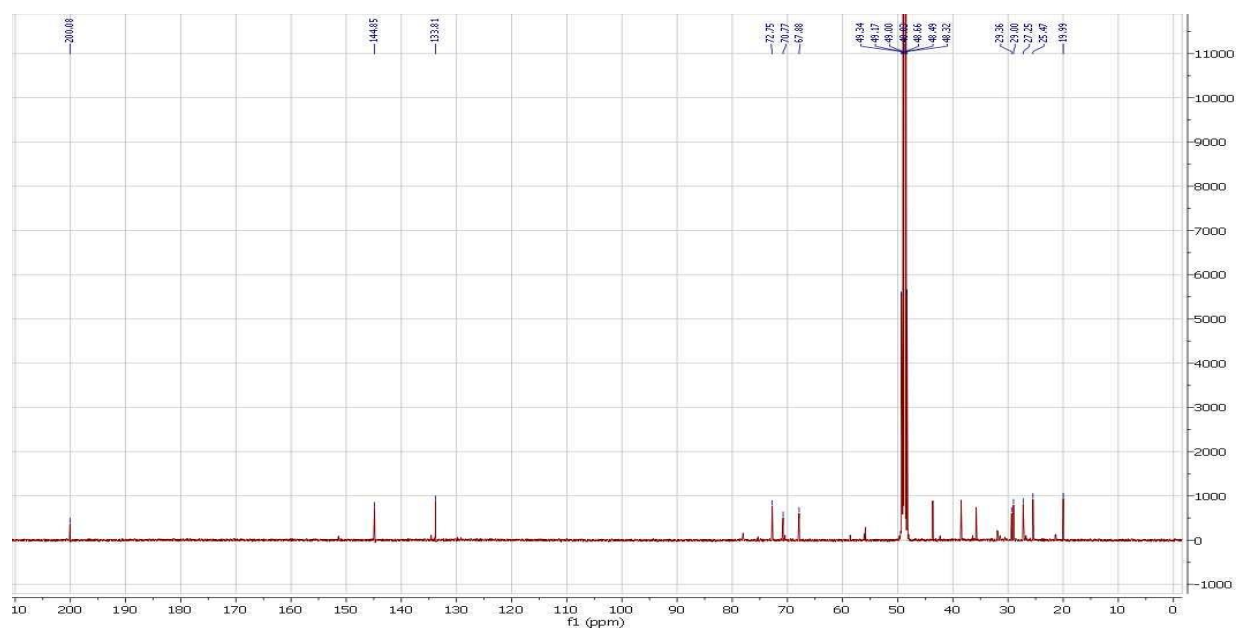

**Figure S10.**  $^{13}\text{C}$ -NMR Spectrum of Compound 2 (125 MHz,  $\text{CD}_3\text{OD}$ )

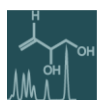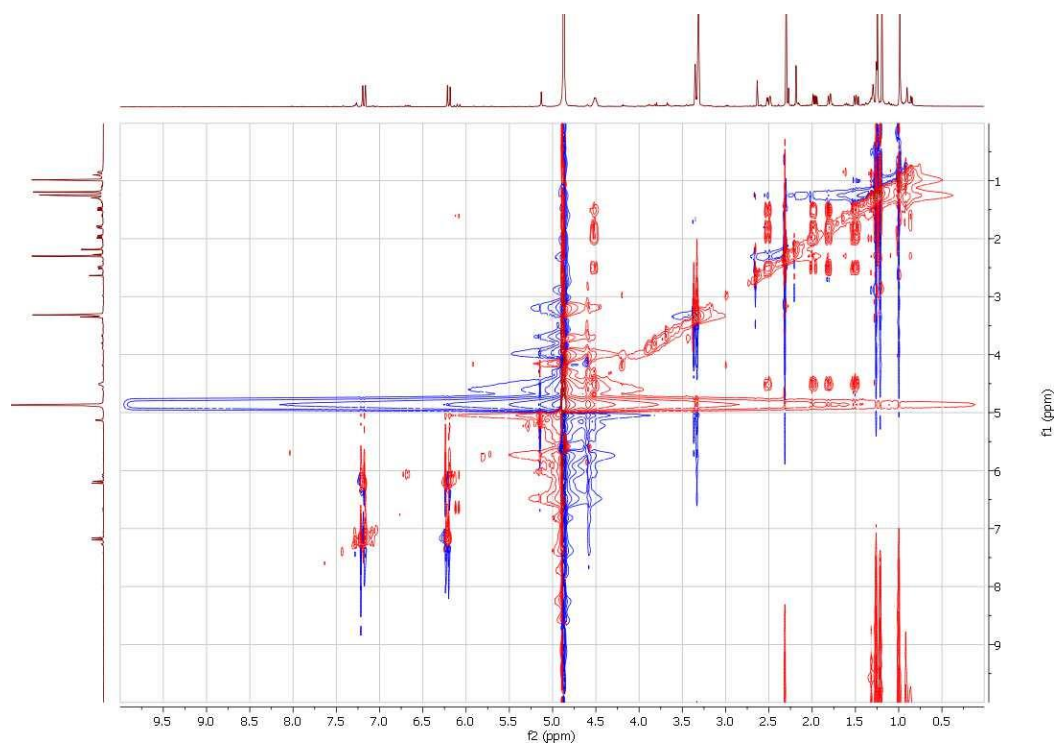

**Figure S11.** TOCSY Spectrum of Compound **2** (500 MHz, CD<sub>3</sub>OD)

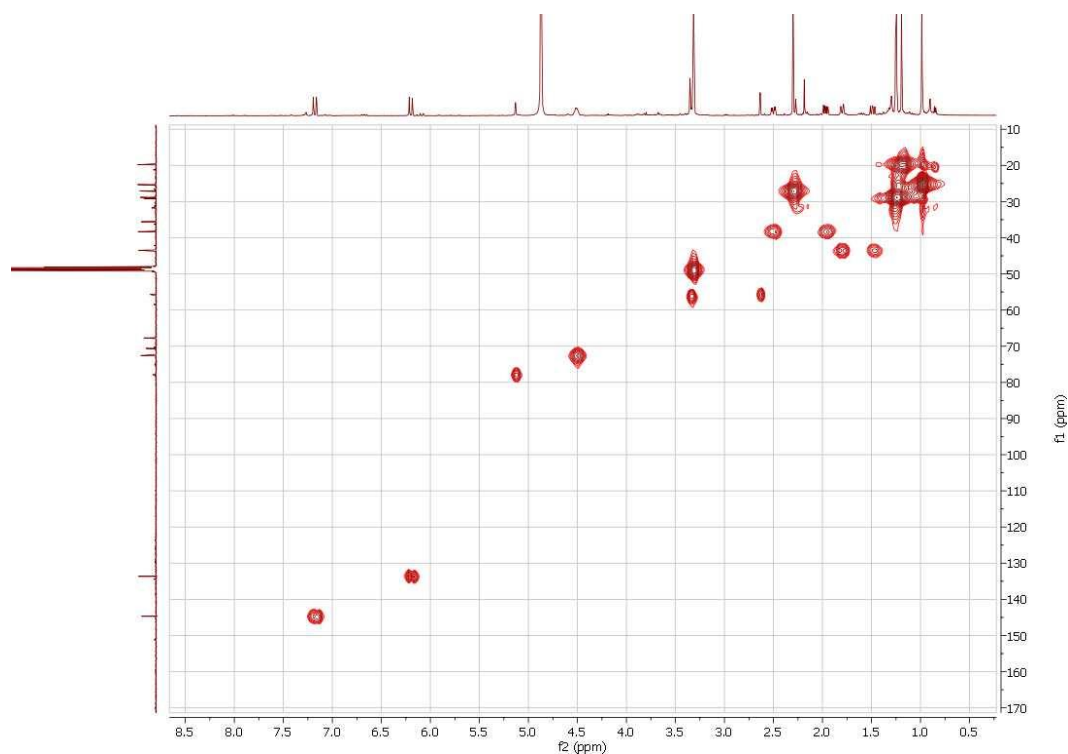

**Figure S12.** HMQC Spectrum of Compound **2** (500 MHz, CD<sub>3</sub>OD)

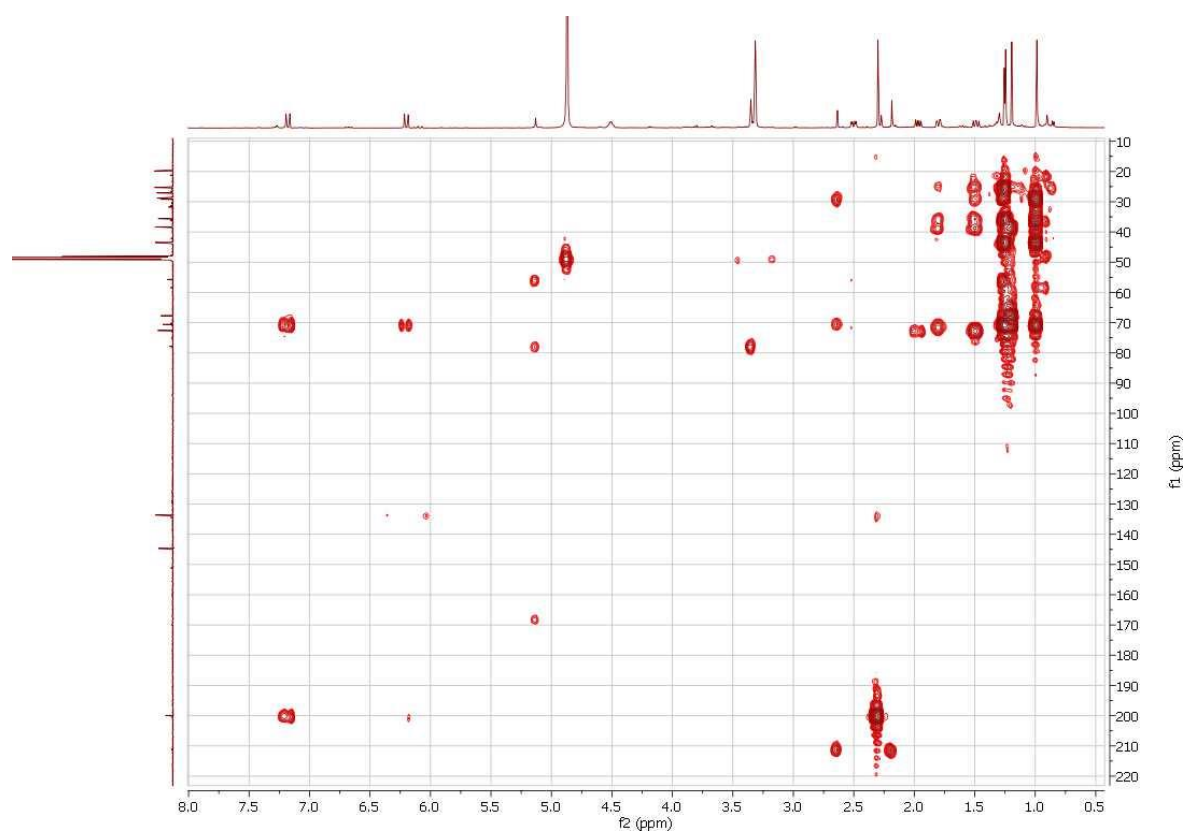

**Figure S13.** HMBC Spectrum of Compound **2** (500 MHz, CD<sub>3</sub>OD)

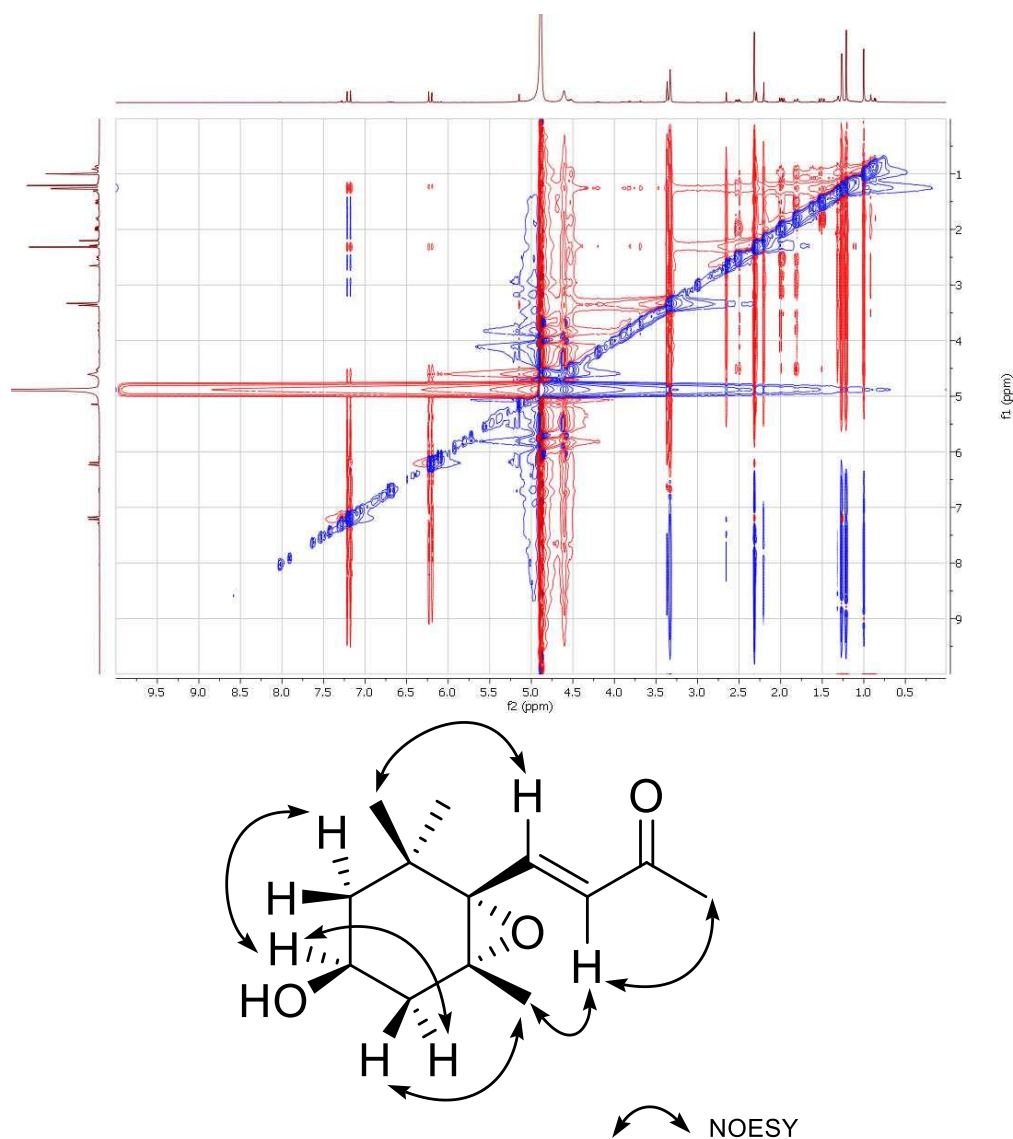

**Figure S14.** NOESY Spectrum of Compound 2 (500 MHz, CD<sub>3</sub>OD)



0053\_190308130124 #13 RT: 0.17 AV: 1 NL: 8.13E5  
T: FTMS + p ESI Full ms [100.00-1000.00]

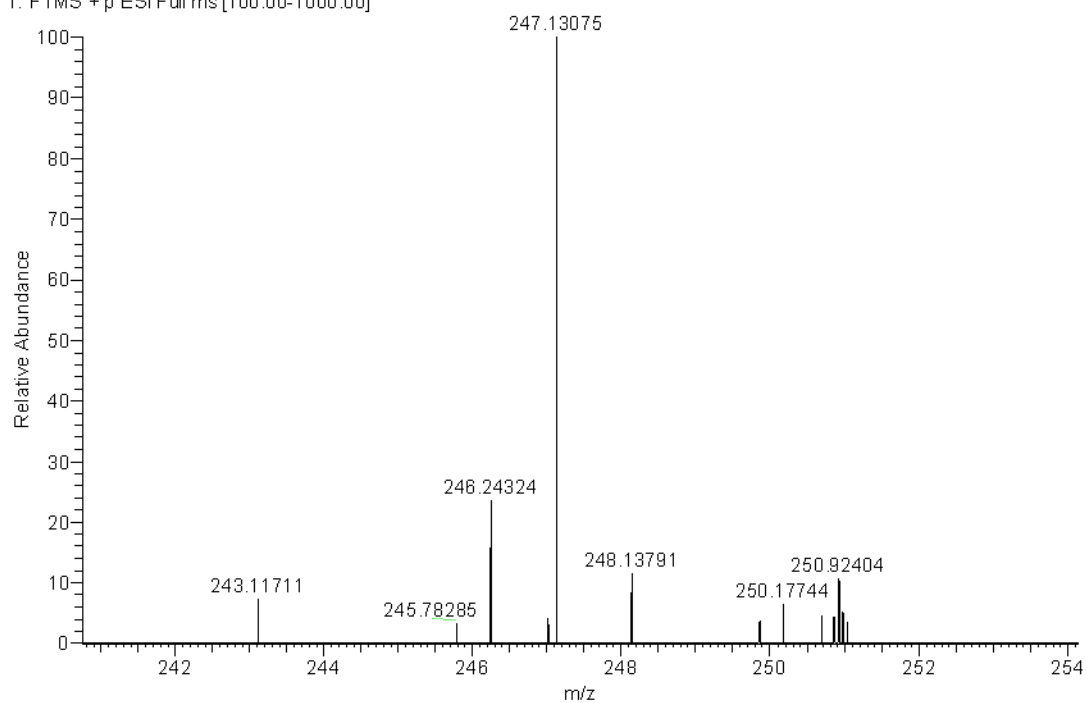

**Figure S15.** HRESI-MS of Compound 2
